# Supplementary material for: Factors Contributing to Urban Malaria Transmission in Sub-Saharan Africa: A Systematic Review
Source: J Trop Med. 2012 Oct 18;2012:819563. doi: 10.1155/2012/819563 (PMC3483782; doi:10.1155/2012/819563)
Supplement: Supplementary file 1 — The Supplementary Material consists of an Excel spreadsheet outlining all papers analysed for the systematic review. It details the location of study, year of publication and topics addressed for each paper returned by the search. [file 819563.f1.xlsx]

## Sheet: Full Matrix
	Number	Title	Type of Article	Year	Location	Code
	1	Sahel, savana, riverine and urban malaria in West Africa: Similar control policies with different outcomes.	Paper	2012	Mali, Senegal, Gambia	VBS, UPR, River
	2	Malaria transmission in Libreville: results of a one year survey.	Paper	2012	Gabon	UPR, Travel, Adaptation
	3	Mosquito species abundance and diversity in Malindi, Kenya and their potential implication in pathogen transmission	Paper	2012	Kenya	UPR, Adaptation, Control
	4	Neighborhood urban environmental quality conditions are likely to drive malaria and diarrhea mortality in Accra, Ghana.	Paper	2011	Ghana	Household, Community
	5	Plasmodium falciparum: differential selection of drug resistance alleles in contiguous urban and peri-urban areas of Brazzaville, Republic of Congo.	Paper	2011	Congo	UPR
	6	Prevalence of malaria among patients attending public health facilities in Maputo City, Mozambique.	Paper	2011	Mozambique	UPR, VBS, Control
	7	Urban malaria and associated risk factors in Jimma town, south-west Ethiopia.	Paper	2011	Ethiopia	UPR, VBS
	8	Spatial variation and socio-economic determinants of Plasmodium falciparum infection in northeastern Tanzania.	Paper	2011	Tanzania	Altitude, River
	9	Heterogeneous decrease in malaria prevalence in children over a six-year period in south-western Uganda.	Paper	2011	Uganda	UPR, Altitude
	10	Anopheles gambiae distribution and insecticide resistance in the cities of Douala and Yaounde (Cameroon): influence of urban agriculture and pollution	Paper	2011	Cameroon	UPR, Adaptation
	11	Identifying residual foci of Plasmodium falciparum infections for malaria elimination: the urban context of Khartoum, Sudan.	Paper	2011	Sudan	River
	12	The impact of the expansion of urban vegetable farming on malaria transmission in major cities of Benin.	Paper	2010	Benin	VBS, Vector, Adaptation
	13	Spatial dispersion and characterisation of mosquito breeding habitats in urban vegetable-production areas of Abidjan, Cote d'Ivoire.	Paper	2010	Cote d'Ivoire	VBS, Coast
	14	Malaria transmission and insecticide resistance of Anopheles gambiae in Libreville and Port-Gentil, Gabon.	Paper	2010	Gabon	Household, UPR, Vector, Community
	15	Spatial heterogeneity and temporal evolution of malaria transmission risk in Dakar, Senegal, according to remotely sensed environmental data.	Paper	2010	Senegal	UPR, VBS
	16	Malaria incidence and prevalence among children living in a peri-urban area on the coast of benin, west Africa: a longitudinal study.	Paper	2010	Benin	Coast
	17	Cohort trial reveals community impact of insecticide-treated nets on malariometric indices in urban Ghana.	Paper	2010	Ghana	Control
	18	An exploratory survey of malaria prevalence and people's knowledge, attitudes and practices of mosquito larval source management for malaria control in western Kenya.	Paper	2010	Kenya	SES
	19	The importance of drains for the larval development of lymphatic filariasis and malaria vectors in Dar es Salaam, United Republic of Tanzania.	Paper	2010	Tanzania	UPR, Drains, Control, VBS
	20	Diversity in anopheline larval habitats and adult composition during the dry and wet seasons in Ouagadougou (Burkina Faso).	Paper	2010	Burkina Faso	UPR, Adaptation, VBS
	21	Significance of travel to rural areas as a risk factor for malarial anemia in an urban setting.	Paper	2010	Kenya	Travel
	22	Household risk factors for clinical malaria in a semi-urban area of Burkina Faso: a case-control study.	Paper	2010	Burkina Faso	Household
	23	Are there geographic and socio-economic differences in incidence, burden and prevention of malaria? A study in southeast Nigeria.	Paper	2009	Nigeria	UPR
	24	Achieving high coverage of larval-stage mosquito surveillance: challenges for a community-based mosquito control programme in urban Dar es Salaam, Tanzania.	Paper	2009	Tanzania	VBS
	25	A temporal-spatial analysis of malaria transmission in Adama, Ethiopia.	Paper	2009	Ethiopia	VBS
	26	Entomological assessment of the potential for malaria transmission in Kibera slum of Nairobi, Kenya.	Paper	2009	Kenya	VBS, Vector, Adaptation, UPR
	27	Nutritional and socio-economic factors associated with Plasmodium falciparum infection in children from Equatorial Guinea: results from a nationally representative survey.	Paper	2009	Guinea	Travel
	28	Epidemiology of malaria in an area prepared for clinical trials in Korogwe, north-eastern Tanzania.	Paper	2009	Tanzania	Altitude, SES
	29	Highly focused anopheline breeding sites and malaria transmission in Dakar.	Paper	2009	Senegal	VBS
	30	Urban agriculture and Anopheles habitats in Dar es Salaam, Tanzania.	Paper	2009	Tanzania	Adaptation
	31	Home-based management of malaria in the era of urbanisation.	Paper	2009	SSA	VBS, River
	32	Distance threshold for the effect of urban agriculture on elevated self-reported malaria prevalence in Accra, Ghana.	Paper	2009	Ghana	VBS, SES
	33	Microbial larvicide application by a large-scale, community-based program reduces malaria infection prevalence in urban Dar es Salaam, Tanzania.	Paper	2009	Tanzania	Vector, Control
	34	A world malaria map: Plasmodium falciparum endemicity in 2007.	Paper	2009	World	UPR
	35	How much malaria occurs in urban Luanda, Angola? A health facility-based assessment.	Paper	2009	Angola	VBS, UPR, SES, Control
	36	Social and environmental malaria risk factors in urban areas of Ouagadougou, Burkina Faso.	Paper	2009	Burkina Faso	Control, Household, Travel, UPR
	37	Factors determining the heterogeneity of malaria incidence in children in Kampala, Uganda.	Paper	2008	Uganda	VBS, Control
	38	Human population, urban settlement patterns and their impact on Plasmodium falciparum malaria endemicity.	Paper	2008	World	UPR
	39	The role of unused swimming pools as a habitat for Anopheles immature stages in urban Malindi, Kenya.	Paper	2008	Kenya	VBS
	40	Mosquito larval habitats and public health implications in Abeokuta, Ogun State, Nigeria.	Paper	2008	Nigeria	VBS, Mutualism
	41	Malaria transmission in Dakar: a two-year survey.	Paper	2008	Senegal	Vector, Adaptation, VBS
	42	Impact of urban agriculture on malaria vectors in Accra, Ghana.	Paper	2008	Ghana	UPR, Control, VBS, Adaptation
	43	Abundance of immature Anopheles and culicines (Diptera: Culicidae) in different water body types in the urban environment of Malindi, Kenya.	Paper	2008	Kenya	VBS
	44	Role of some environmental factors on the breeding activity of Anopheles arabiensis in New Halfa town, eastern Sudan.	Paper	2008	Sudan	Vector, VBS
	45	Malaria control in an urban area: a success story from Khartoum, 1995-2004.	Paper	2008	Sudan	VBS
	46	Quantitative urban classification for malaria epidemiology in sub-Saharan Africa.	Paper	2008	Kenya	UPR
	47	Heavy metals in mosquito larval habitats in urban Kisumu and Malindi, Kenya, and their impact.	Paper	2008	Kenya	Adaptation
	48	Rural-urban differences in maternal responses to childhood fever in South East Nigeria	Paper	2008	Nigeria	SES
	49	A tool box for operational mosquito larval control: preliminary results and early lessons from the Urban Malaria Control Programme in Dar es Salaam, Tanzania.	Paper	2008	Tanzania	Control
	50	Urban malaria risk in sub-Saharan Africa: where is the evidence?	Paper	2007	SSA	UPR, Vector
	51	Geographical disparities in core population coverage indicators for roll back malaria in Malawi.	Paper	2007	Malawi	SES, Control
	52	The association between distance to water pipes and water bodies positive for anopheline mosquitoes (Diptera: Culicidae) in the urban community of Malindi, Kenya.	Paper	2007	Kenya	VBS
	53	Anopheles gambiae exploits the treehole ecosystem in western Kenya: a new urban malaria risk?	Paper	2007	Kenya	VBS, Altitude
	54	Anopheles gambiae s.s. breeding in polluted water bodies in urban Lagos, southwestern Nigeria.	Paper	2007	Nigeria	Adaptation
	55	Interdependence of domestic malaria prevention measures and mosquito-human interactions in urban Dar es Salaam, Tanzania.	Paper	2007	Tanzania	Vector, Household, VBS, Control
	56	Rapid Urban Malaria Appraisal (RUMA) II: epidemiology of urban malaria in Dar es Salaam (Tanzania).	Paper	2006	Tanzania	UPR, Vector
	57	Rapid Urban Malaria Appraisal (RUMA) III: epidemiology of urban malaria in the municipality of Yopougon (Abidjan).	Paper	2006	Abidjan	UPR, Travel
	58	Urban agricultural land use and characterization of mosquito larval habitats in a medium-sized town of Cote d'Ivoire.	Paper	2006	Cote d'Ivoire	UPR, VBS, Adaptation
	59	Impact of urbanisation on bionomics and distribution of malaria vectors in Lagos, southwestern Nigeria	Paper	2006	Nigeria	Vector
	60	Urban farming and malaria risk factors in a medium-sized town in Cote d'Ivoire.	Paper	2006	Cote d'Ivoire	VBS, Household
	61	Community-based surveillance of malaria vector larval habitats: a baseline study in urban Dar es Salaam, Tanzania.	Paper	2006	Tanzania	VBS
	62	Variation in malaria transmission intensity in seven sites throughout Uganda.	Paper	2006	Uganda	Vector
	63	Rapid Urban Malaria Appraisal (RUMA) IV: epidemiology of urban malaria in Cotonou (Benin).	Paper	2006	Benin	UPR, Coast
	64	Genetic diversity and structure of African Plasmodium falciparum populations in urban and rural areas.	Paper	2006	Senegal, Niger, Djibouti	UPR
	65	Urban malaria and anaemia in children: a cross-sectional survey in two cities of Ghana.	Paper	2006	Ghana	SES
	66	Housing conditions and Plasmodium falciparum infection: protective effect of iron-sheet roofed houses.	Paper	2006	Burkina Faso	SES, Control
	67	Urbanization, malaria transmission and disease burden in Africa.	Paper	2005	Africa	UPR
	68	Malaria and urbanization in sub-Saharan Africa.	Paper	2005	SSA	UPR, Control
	69	Rapid urban malaria appraisal (RUMA) I: epidemiology of urban malaria in Ouagadougou	Paper	2005	Burkina Faso	UPR, Household, VBS, Control
	70	Rapid urban malaria appraisal (RUMA) in sub-Saharan Africa.	Paper	2005	Dakar, Burkina Faso, Cote d'Ivoire, Benin	UPR
	71	Malaria vectors and urbanization in the equatorial forest region of south Cameroon.	Paper	2005	Cameroon	River, VBS
	72	Habitat characterization and spatial distribution of Anopheles sp. mosquito larvae in Dar es Salaam (Tanzania) during an extended dry period.	Paper	2005	Tanzania	VBS, Adaptation, UPR
	73	The influence of urbanisation on measures of Plasmodium falciparum infection prevalence in East Africa.	Paper	2005	Kenya, Tanzania, Uganda	UPR
	74	Urbanization in sub-saharan Africa and implication for malaria control.	Paper	2004	SSA	UPR, Control
	75	Ecological limitations on aquatic mosquito predator colonization in the urban environment.	Paper	2004	Kenya	VBS, Control
	76	Does irrigated urban agriculture influence the transmission of malaria in the city of Kumasi, Ghana?	Paper	2004	Ghana	VBS
	77	Stratification of Khartoum urban area by the risk of malaria transmission.	Paper	2003	Sudan	VBS
	78	Short report: proximity to mosquito breeding sites as a risk factor for clinical malaria episodes in an urban cohort of Ugandan children.	Paper	2003	Uganda	VBS
	79	An estimation of the entomological inoculation rate for Ifakara: a semi-urban area in a region of intense malaria transmission in Tanzania.	Paper	2003	Tanzania	Vector, UPR, VBS, Household
	80	A geographic sampling strategy for studying relationships between human activity and malaria vectors in urban Africa.	Paper	2003	Kenya	Vector, VBS, SES
	81	Malaria transmission in urban sub-Saharan Africa.	Paper	2003	SSA	UPR
	82	A study of the urban malaria transmission problem in Khartoum.	Paper	2000	Sudan	UPR, VBS
	83	Severe malaria in Burkina Faso: urban and rural environment.	Paper	1999	Burkina Faso	UPR, Control
	84	Ecology of larval mosquitoes, with special reference to Anopheles arabiensis (Diptera: Culcidae) in market-garden wells in urban Dakar, Senegal.	Paper	1998	Senegal	VBS
	85	Impact of rapid urbanization on mosquitoes and their disease transmission potential in Accra and Tema, Ghana.	Paper	1995	Ghana	Vector, VBS
	86	Socio-economic risk factors for malaria in a peri-urban area of The Gambia.	Paper	1995	The Gambia	Vector, VBS, Travel, SES, Control
	87	Prevalence of asymptomatic parasitaemia in an urban and rural community in south western Nigeria	Paper	1995	Nigeria	SES
	88	Trends, priorities and policy directions in the control of vector-borne diseases in urban environments.	Paper	1994	World	VBS
	89	Studies of anopheline mosquitoes transmitting malaria in a newly developed highland urban area: a case study of Moi University and its environs.	Paper	1994	Kenya	Vector, VBS
	90	Rice cultivation and malaria transmission in Bouake city (Cote d'Ivoire).	Paper	1994	Cote d'Ivoire	VBS
	91	Reducing the risk of malaria acquisition by urban dwellers of sub-Saharan Africa during travel in malaria-endemic areas.	Paper	1994	SSA	Travel
	92	Entomological risk factors for severe malaria in a peri-urban area of The Gambia.	Paper	1993	The Gambia	Household, VBS
	93	Importance of low dispersion of Anopheles gambiae (Diptera: Culicidae) on malaria transmission in hilly towns in south Cameroon.	Paper	1993	Cameroon	UPR, Altitude
	94	Malaria in urban and rural Kinshasa: the entomological input.	Paper	1993	DRC	UPR
	95	Malaria transmission in the lagoon area of Cotonou, Benin.	Paper	1992	Benin	Coast
	96	Vector density gradients and the epidemiology of urban malaria in Dakar, Senegal.	Paper	1992	Senegal	Vector
	97	Vector-borne disease problems in rapid urbanization: new approaches to vector control.	Paper	1992	World	UPR
	98	Prospects for malaria control in urban and rural Kinshasa.	Paper	1991	DRC	VBS, Control
	99	Malaria in a peri-urban area of The Gambia	Paper	1990	The Gambia	SES, Housing, VBS
	100	Malaria in an urban and a rural area of Zambia.	Paper	1990	Zambia	VBS
	101	Some risk factors for transmission of malaria in a population where control measures were applied in Zambia.	Paper	1989	Zambia	UPR
	102	Malaria and urbanization in central Africa: the example of Brazzaville. Part III: Relationships between urbanization and the intensity of malaria transmission.	Paper	1987	DRC	VBS, UPR
	103	Malaria and urbanization in central Africa: the example of Brazzaville. Part II: Results of entomological surveys and epidemiological analysis.	Paper	1987	DRC	UPR, Vector
	104	Malaria in urban and rural areas of southern Ghana: a survey of parasitaemia and of anti-malarial practice.	Paper	1984	Ghana	Control
	1	[Will climate and demography have a major impact on malaria in sub-Saharan Africa in the next 20 years?]	Abstract (French)	2009	SSA	UPR
	2	Knowledge, attitudes and practices of populations towards mosquitoes in urban and rural area (Cote d'Ivoire--West Africa)	Abstract (French)	2004	Cote d'Ivoire	Control
	3	Eco-epidemiology of malaria in Niamey and in the river valley, the Republic of Niger, 1992-1995	Abstract (French)	1997	Niger	River
	4	Epidemiological data on children hospitalized with malaria from 1983 to 1992	Abstract (French)	1993	Madagascar	UPR
	5	Coastal urban malaria in Cotonou (Republic of Benin). Entomological study	Abstract (French)	1992	Benin	Coast
	6	The Anopheles fauna and the transmission of human malaria in Kinshasa (Zaire)	Abstract (French)	1992	DRC	UPR
	7	Urban malaria in Yaounde (Cameroon). 2. Entomologic study in 2 suburban districts	Abstract (French)	1992	Cameroon	UPR
	8	Dispersion of Anopheles gambiae s.l. in an urban zone of Ouagadougou (Burkina Faso)	Abstract (French)	1986	Burkina Faso	VBS
	9	Urban and rural malaria in Niger. The case of the Department of Maradi	Abstract (French)	1986	Niger	UPR
					Key:	Key:
					SSA = sub-Saharan Africa	URP = urban, rural, peri-urban comparison
						VBS = vector breeding site
						SES = socio-economic status

## Sheet: Final Table
	Topic	Years Published	Locations	No Citations
	Urban, Peri-Urban, Rural Comparisons	1986-2012	Senegal, Gabon, Kenya, Congo, Mozambique, Ethiopia, Uganda, Cameroon, Tanzania, Burkina Faso, Nigeria, Angola, Ghana, Abidjan, Cote d'Ivoire, Benin, Niger, Dijibouti, Dakar, Sudan, DRC, Zambia, Madagascar	48
	Vector	1987-2012	Benin, Gabon, Kenya, Tanzania, Senegal, Sudan, Nigeria, Uganda, Ghana, The Gambia, DRC	18
	River	1997-2012	Gambia, Mali, Tanzania, Sudan, Cameroon, Niger	6
	Coast	1992-2012	Cote d'Ivoire, Benin	5
	Altitude	1993-2012	Tanzania, Uganda, Kenya, Cameroon	5
	Vector Breeding Site (Artificial & Human)	1986-2012	Mali, Mozambique, Ethiopia, Benin, Cote d'Ivoire, Senegal, Tanzania, Burkina Faso, Kenya, Ghana, Angola, Uganda, Nigeria, Sudan, Cameroon, The Gambia, DRC, The Gambia	51
	Socio-Economic Status	1990-2012	Kenya, Tanzania, Ghana, Angola, Nigeria, Malawi, Burkina Faso, The Gambia	12
	Household	1993-2011	Ghana, Gabon, Burkina Faso, Tanzania, Cote d'Ivoire, The Gambia	9
	Community	2010-2011	Ghana, Gabon	2
	Travel	1994-2012	Gabon, Kenya, Guinea, Burkina Faso, Abidjan, The Gambia	6
	Adaptation/Mutualism	2005-2011	Gabon, Kenya, Cameroon, Benin, Burkina Faso, Tanzania, Senegal, Ghana, Nigeria, Cote d'Ivoire	13
	Control	1984-2012	Kenya, Mozambique, Ghana, Tanzania, Angola, Burkina Faso, Uganda, Malawi, The Gambia, DRC, Cote d'Ivoire	22
